# Supplementary material for: CRISPR/Cas9 Mediated Knockout of Cyclooxygenase-2 Gene Inhibits Invasiveness in A2058 Melanoma Cells
Source: MDPI journal article supplement (doi:10.3390/cells11040749), 2022-02-21

*Article*

# **CRISPR/Cas9 mediated knockout of cyclooxygenase-2 gene inhibits invasiveness in A2058 melanoma cells**

Cathleen Haase-Kohn <sup>1\*</sup>, Markus Laube <sup>1</sup>, Cornelius K. Donat<sup>2</sup>, Birgit Belter<sup>1</sup> and Jens Pietzsch <sup>1,3</sup>

## **Supporting Information**

### **Content:**

- S1: Original Western Blots of COX-2 protein content
- S2: Prostaglandin-E2 ELISA of A2058 and three clones of A2058-COX-2KO cells
- S3: In vitro cell growth of A2058 and three clones of A2058-COX-2KO cells
- S4: Subcutaneous tumor growth of two additionally A2058-COX-2KO cell lines
- S5: Representative images of the scratch assay in 10% FCS
- S6: Representative images of the scratch assay in 0% FCS

Figure S1: Protein content of COX-2 in A2058 and A2058-COX-2KO melanoma cell lines

**TOP:  $\beta$ -actin**  
Cell lysates,  
substrate Pico, exposure 30 s

**Bottom: COX-2**  
Cell lysates,  
substrate Pico:Femto 4:1,  
exposure 300 s

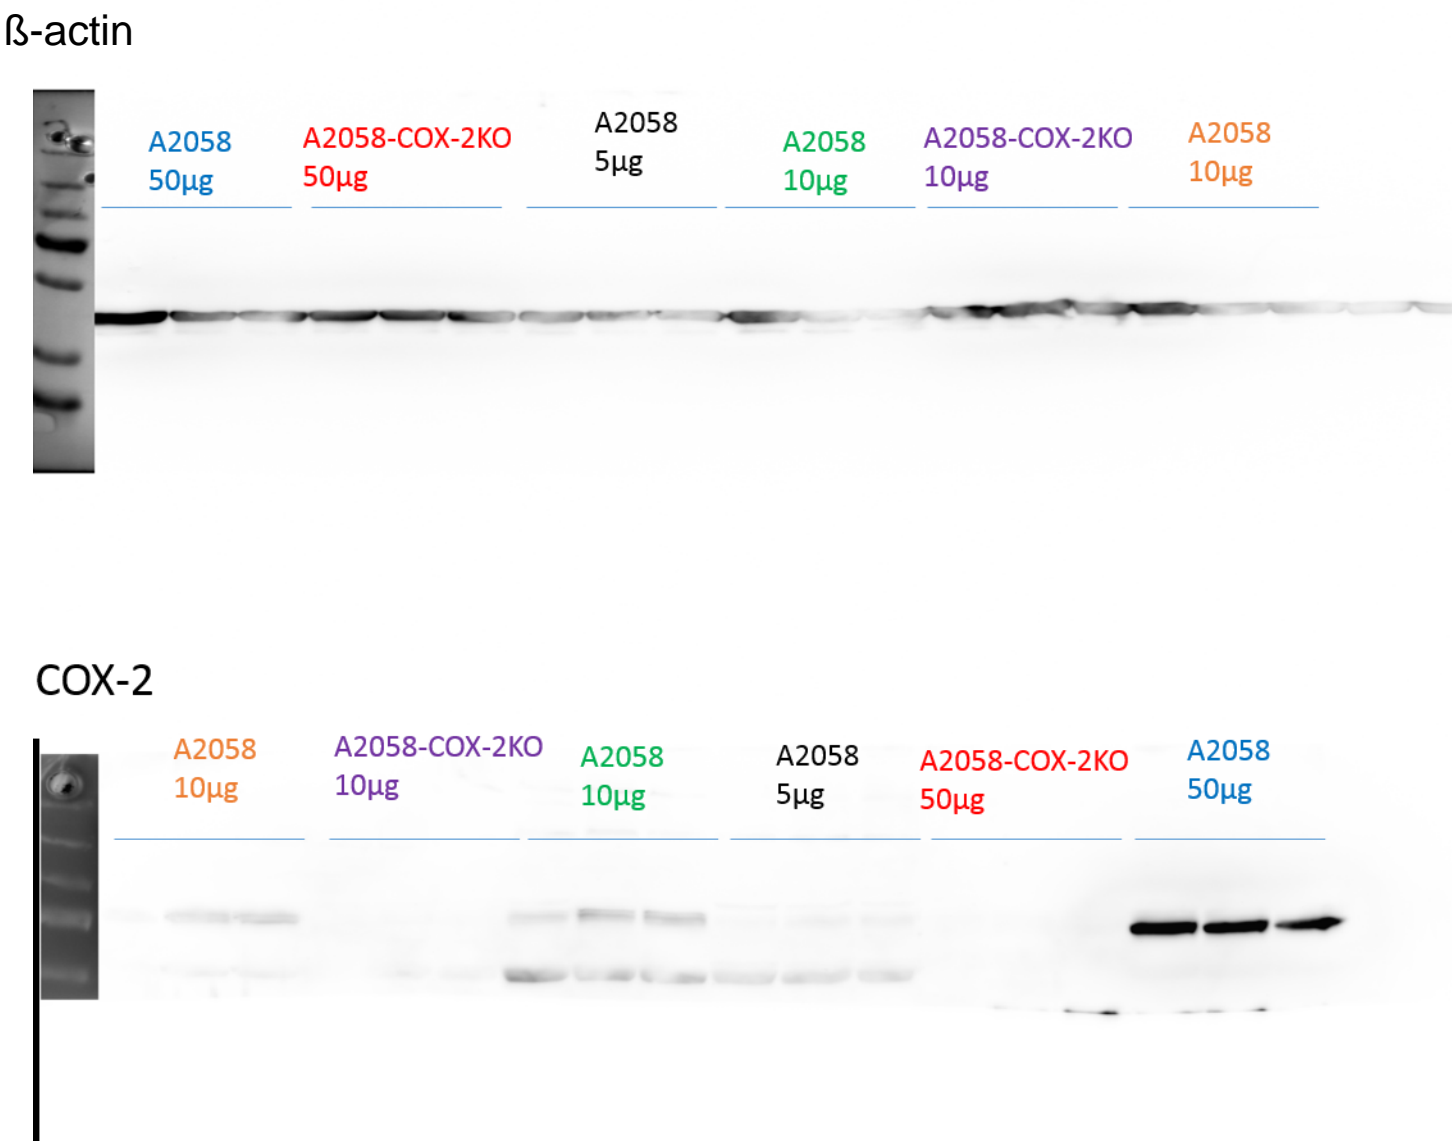

Figure S2: Prostaglandin E2 ELISA in cultured supernatants from A2058 and three different clones of A2058-COX-2KO cell lines in melanoma

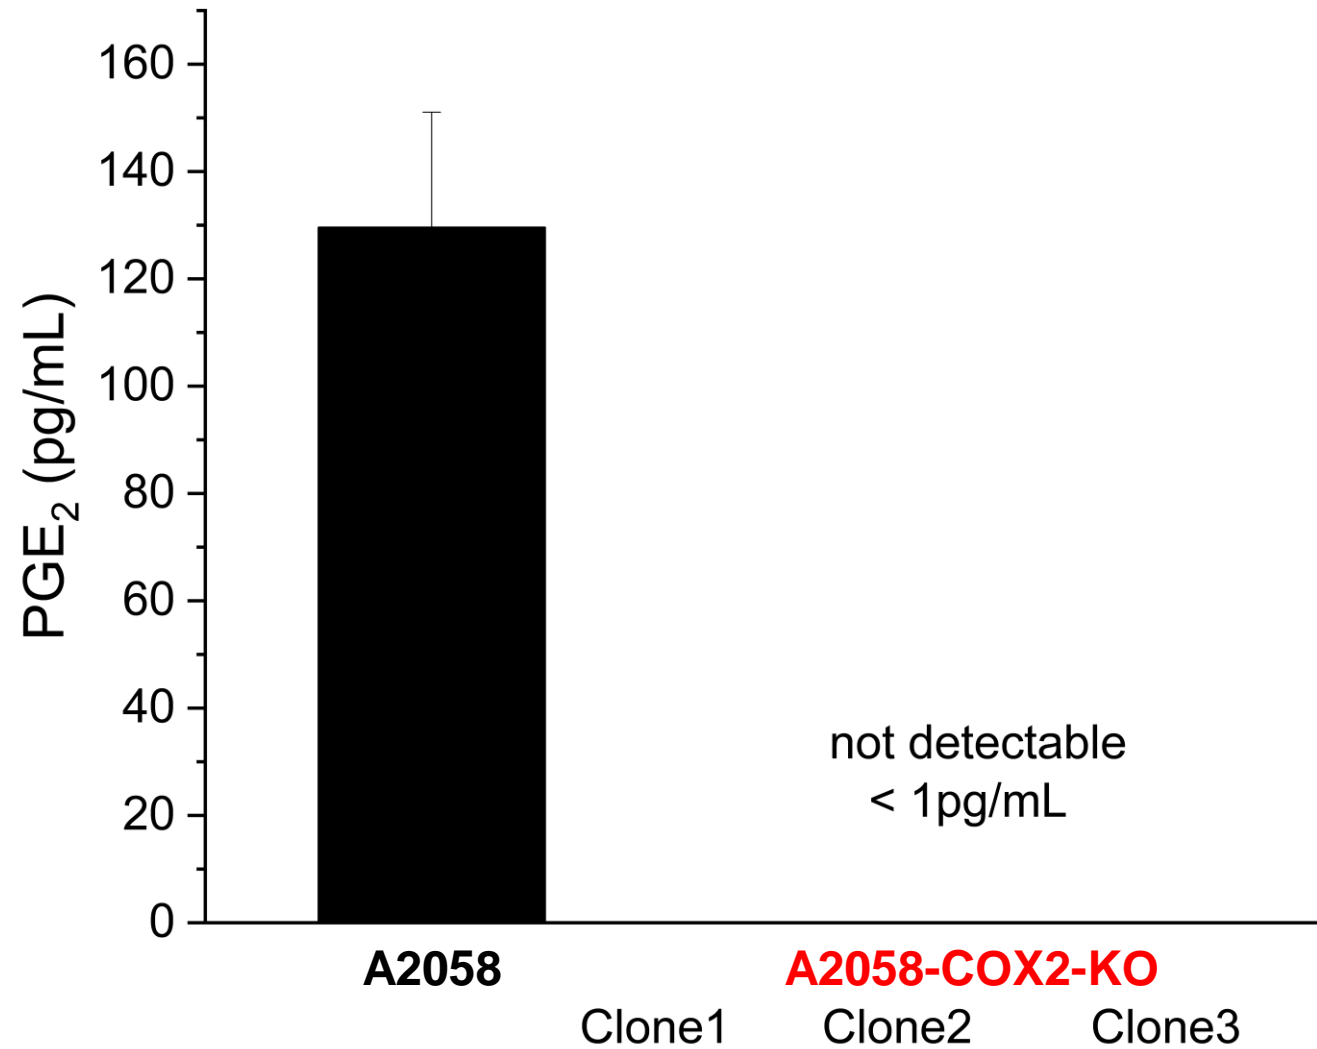

Figure S3: Analysis of cellular growth of A2058 and three different clones of A2058-COX-2KO (ACKO) cells using a CASY1 cell counter.

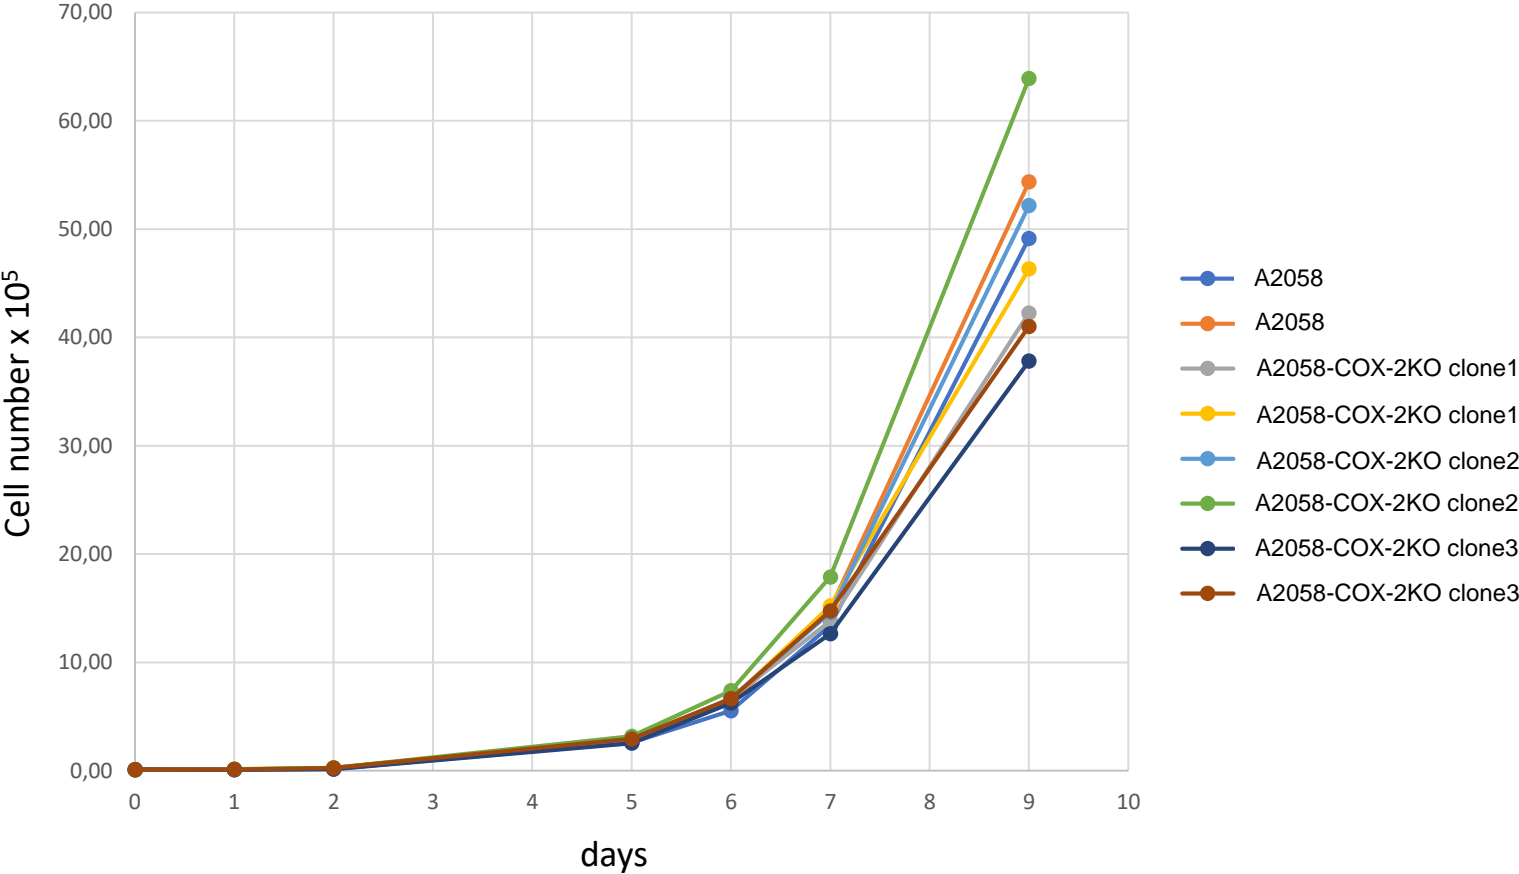

Figure S4: Tumor growth rate and progression analysis after the subcutaneous injection of two additional clones of A2058-COX-2KO cells in NMRI-nude mice.

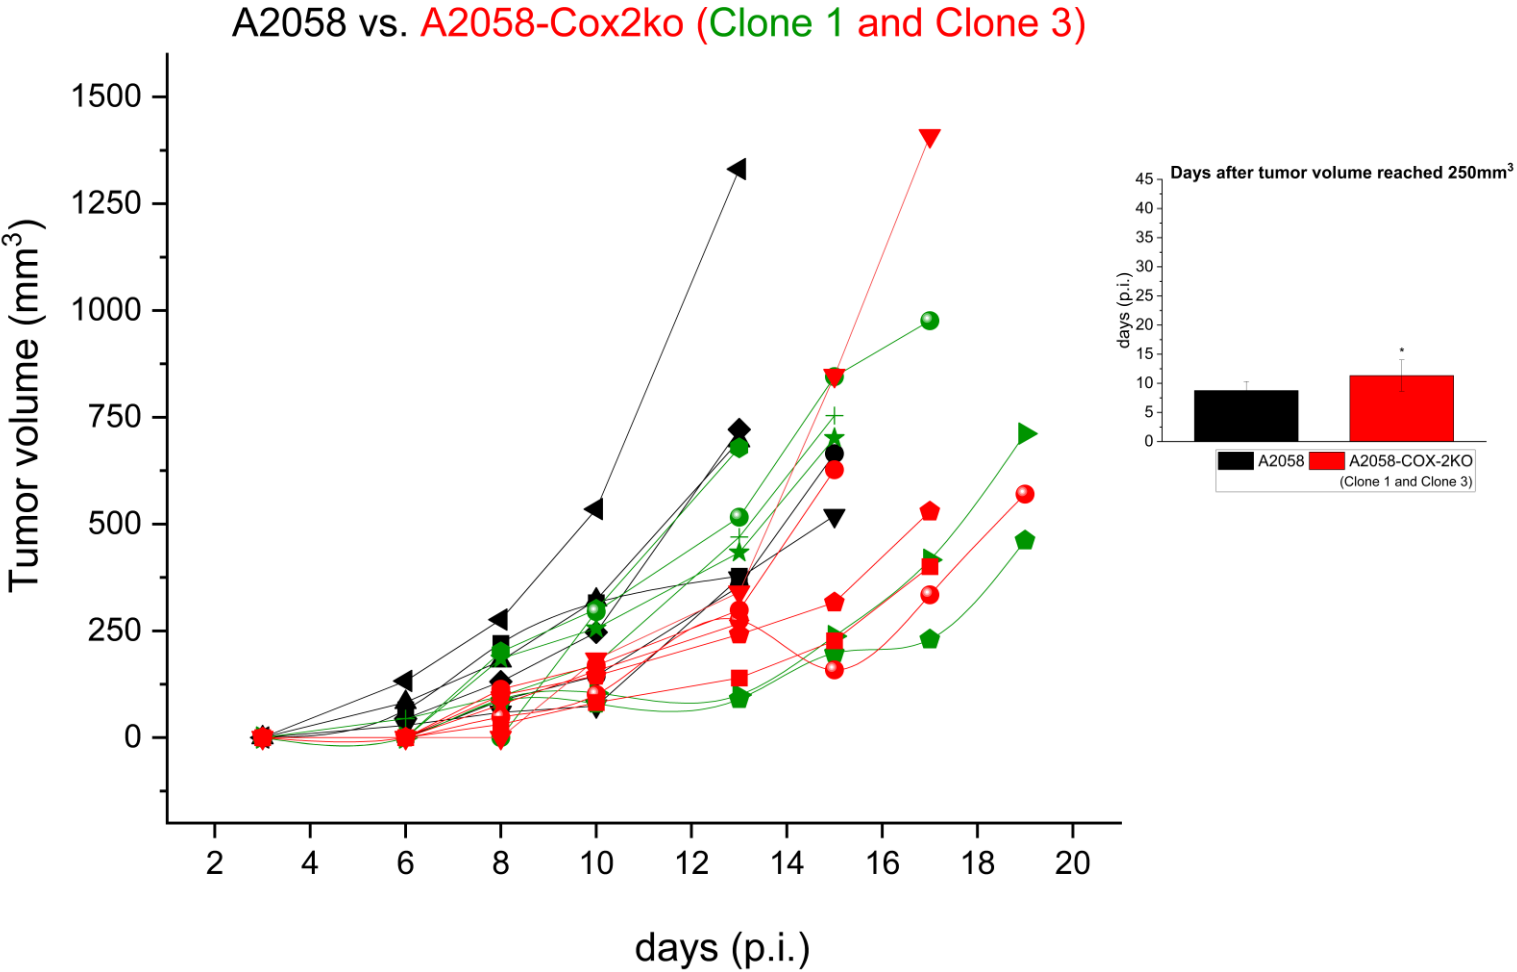



Figure S5: Representative images of scratch migration assay of A2058 and A2058-COX-2KO with 10% FCS.

A2058

0 h

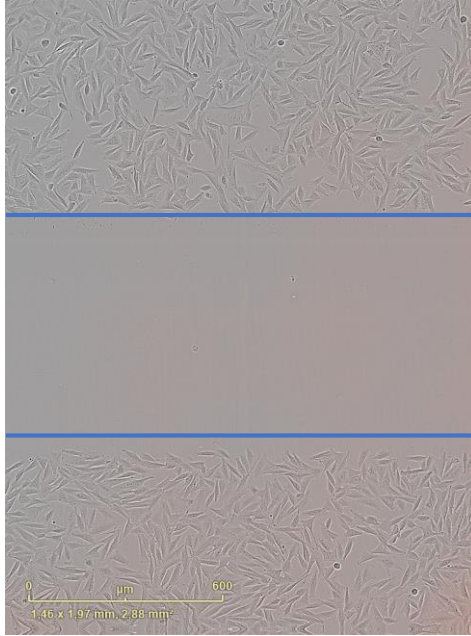

24 h

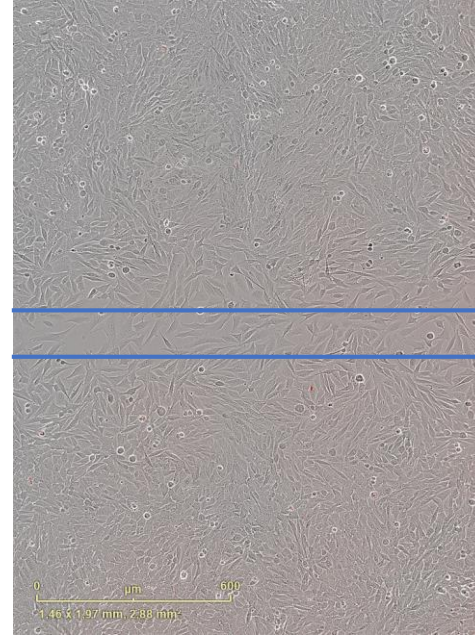

96 h

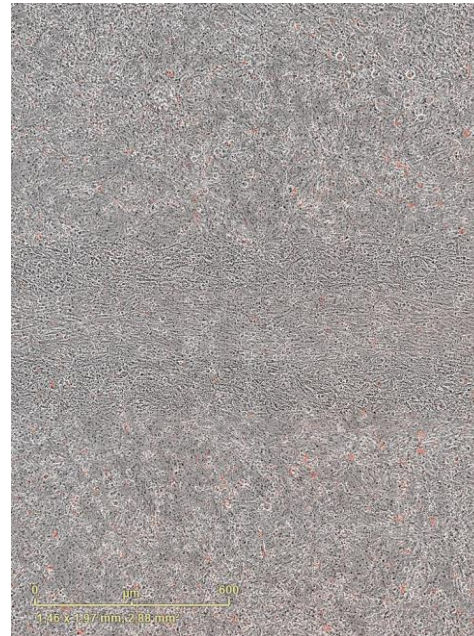

156 h

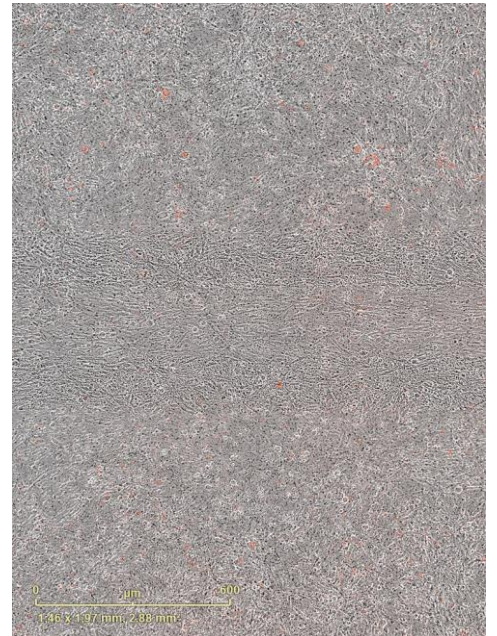

A2058-COX-2KO

0 h

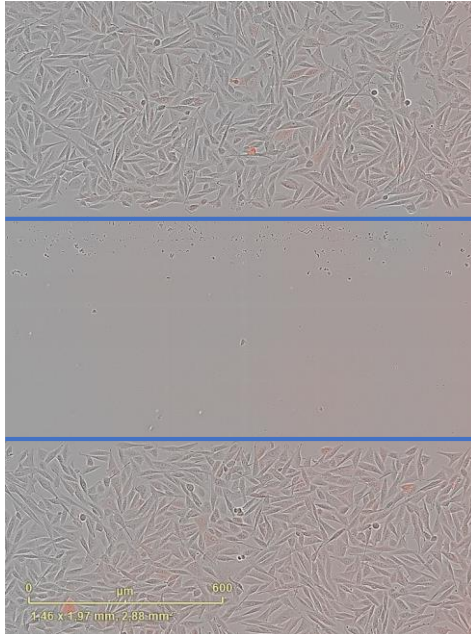

24 h

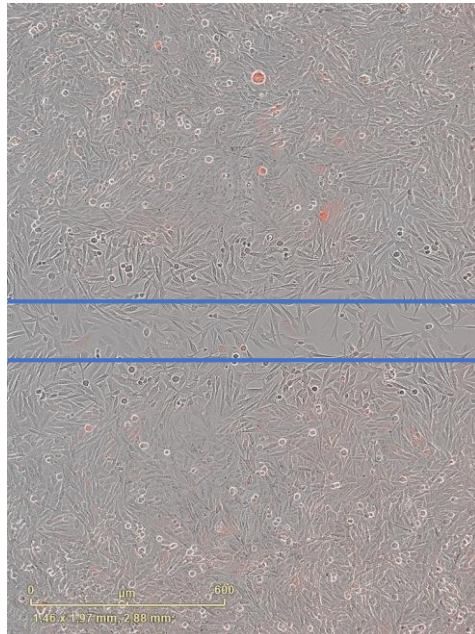

96 h

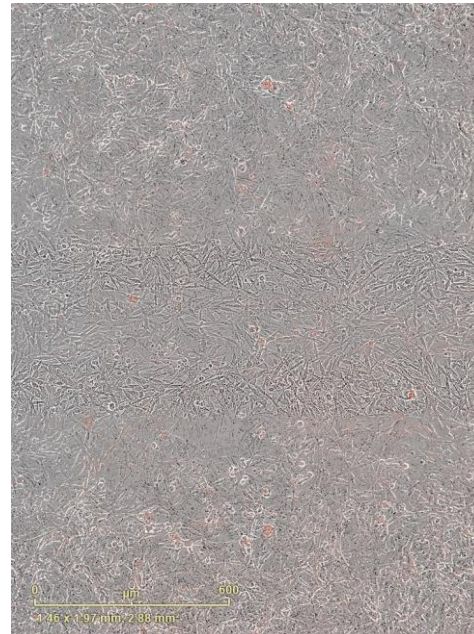

156 h

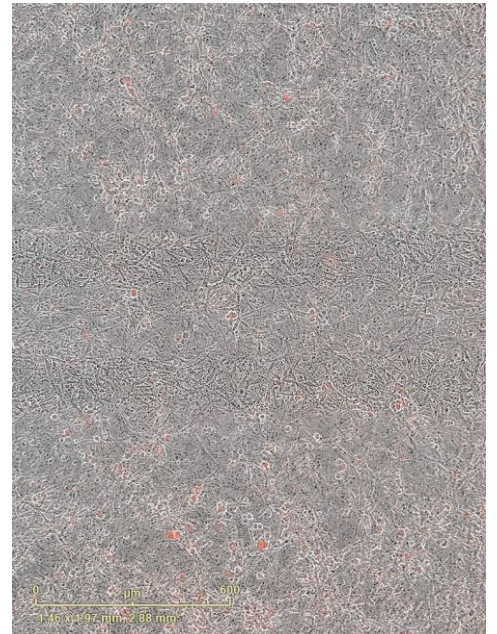



Figure S6: Representative images of scratch migration assay of A2058 and A2058-COX-2KO without FCS.

A2058

0 h

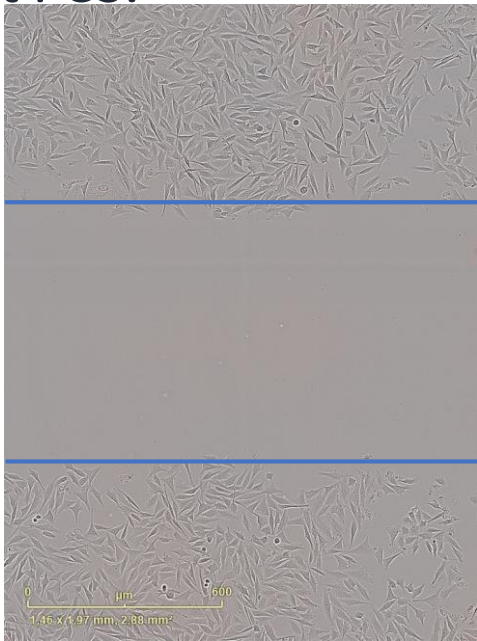

24 h

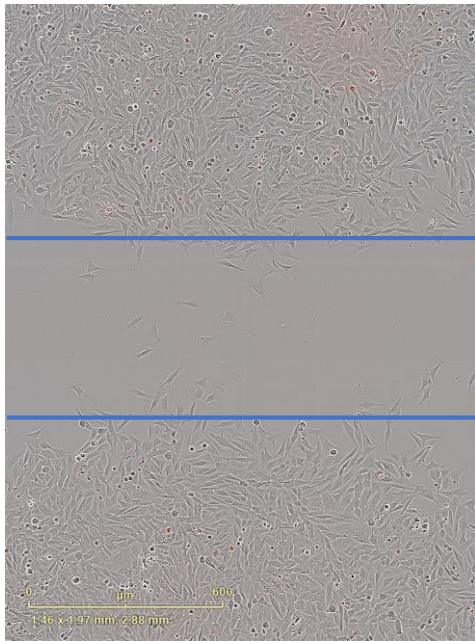

96 h

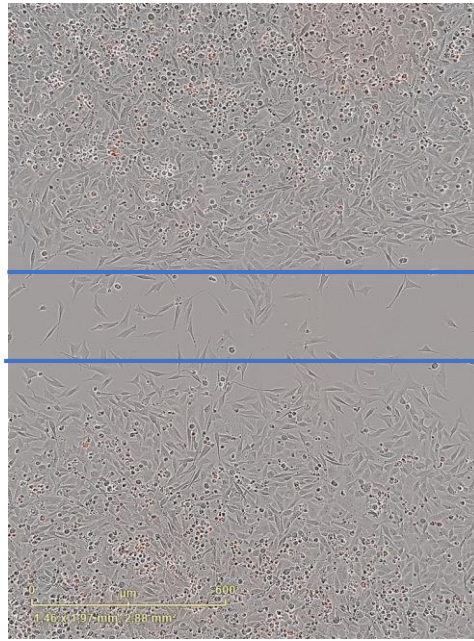

156 h

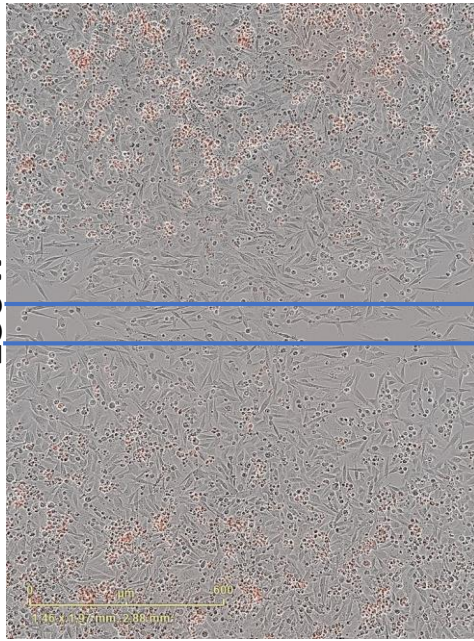

A2058-COX-2KO

0 h

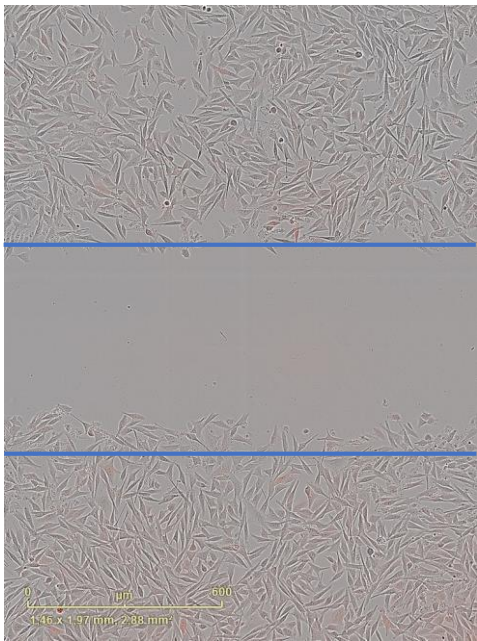

24 h

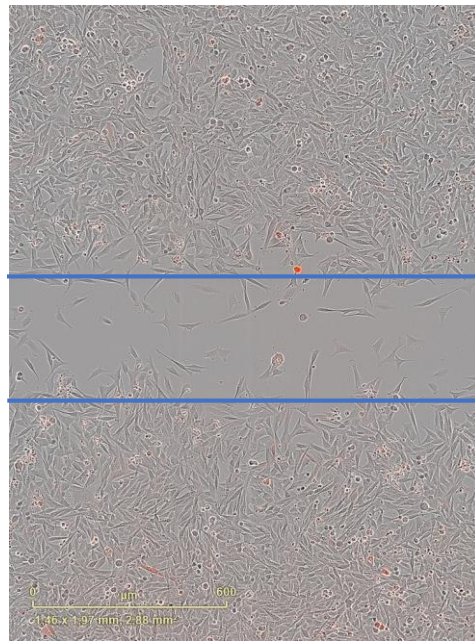

96 h

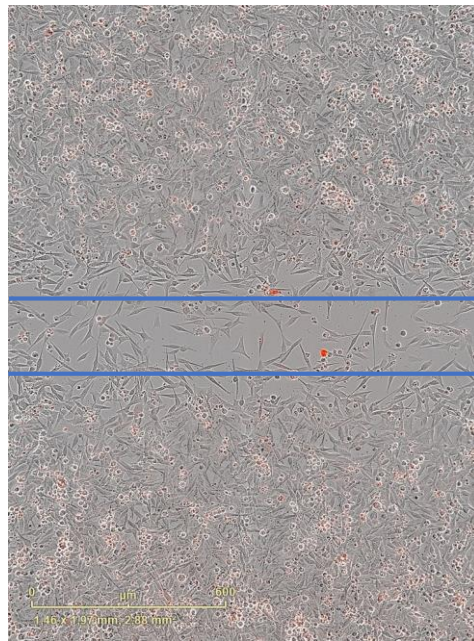

156 h

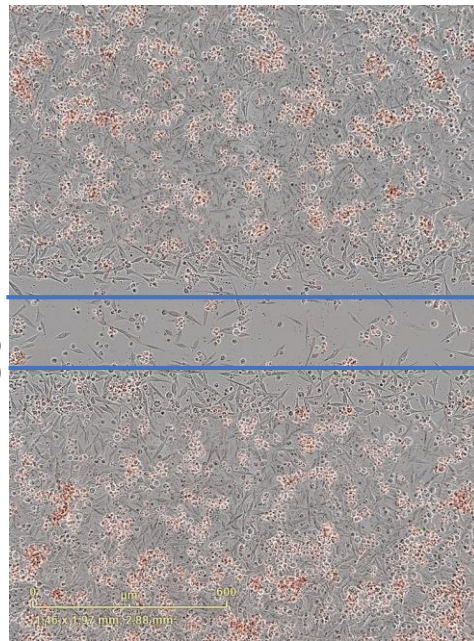

Supplement: s1 [file s1]
